# Supplementary material
Source: ML conference proceedings conference paper supplement (https://aclanthology.org/2021.naacl-main.227)

# Laptop

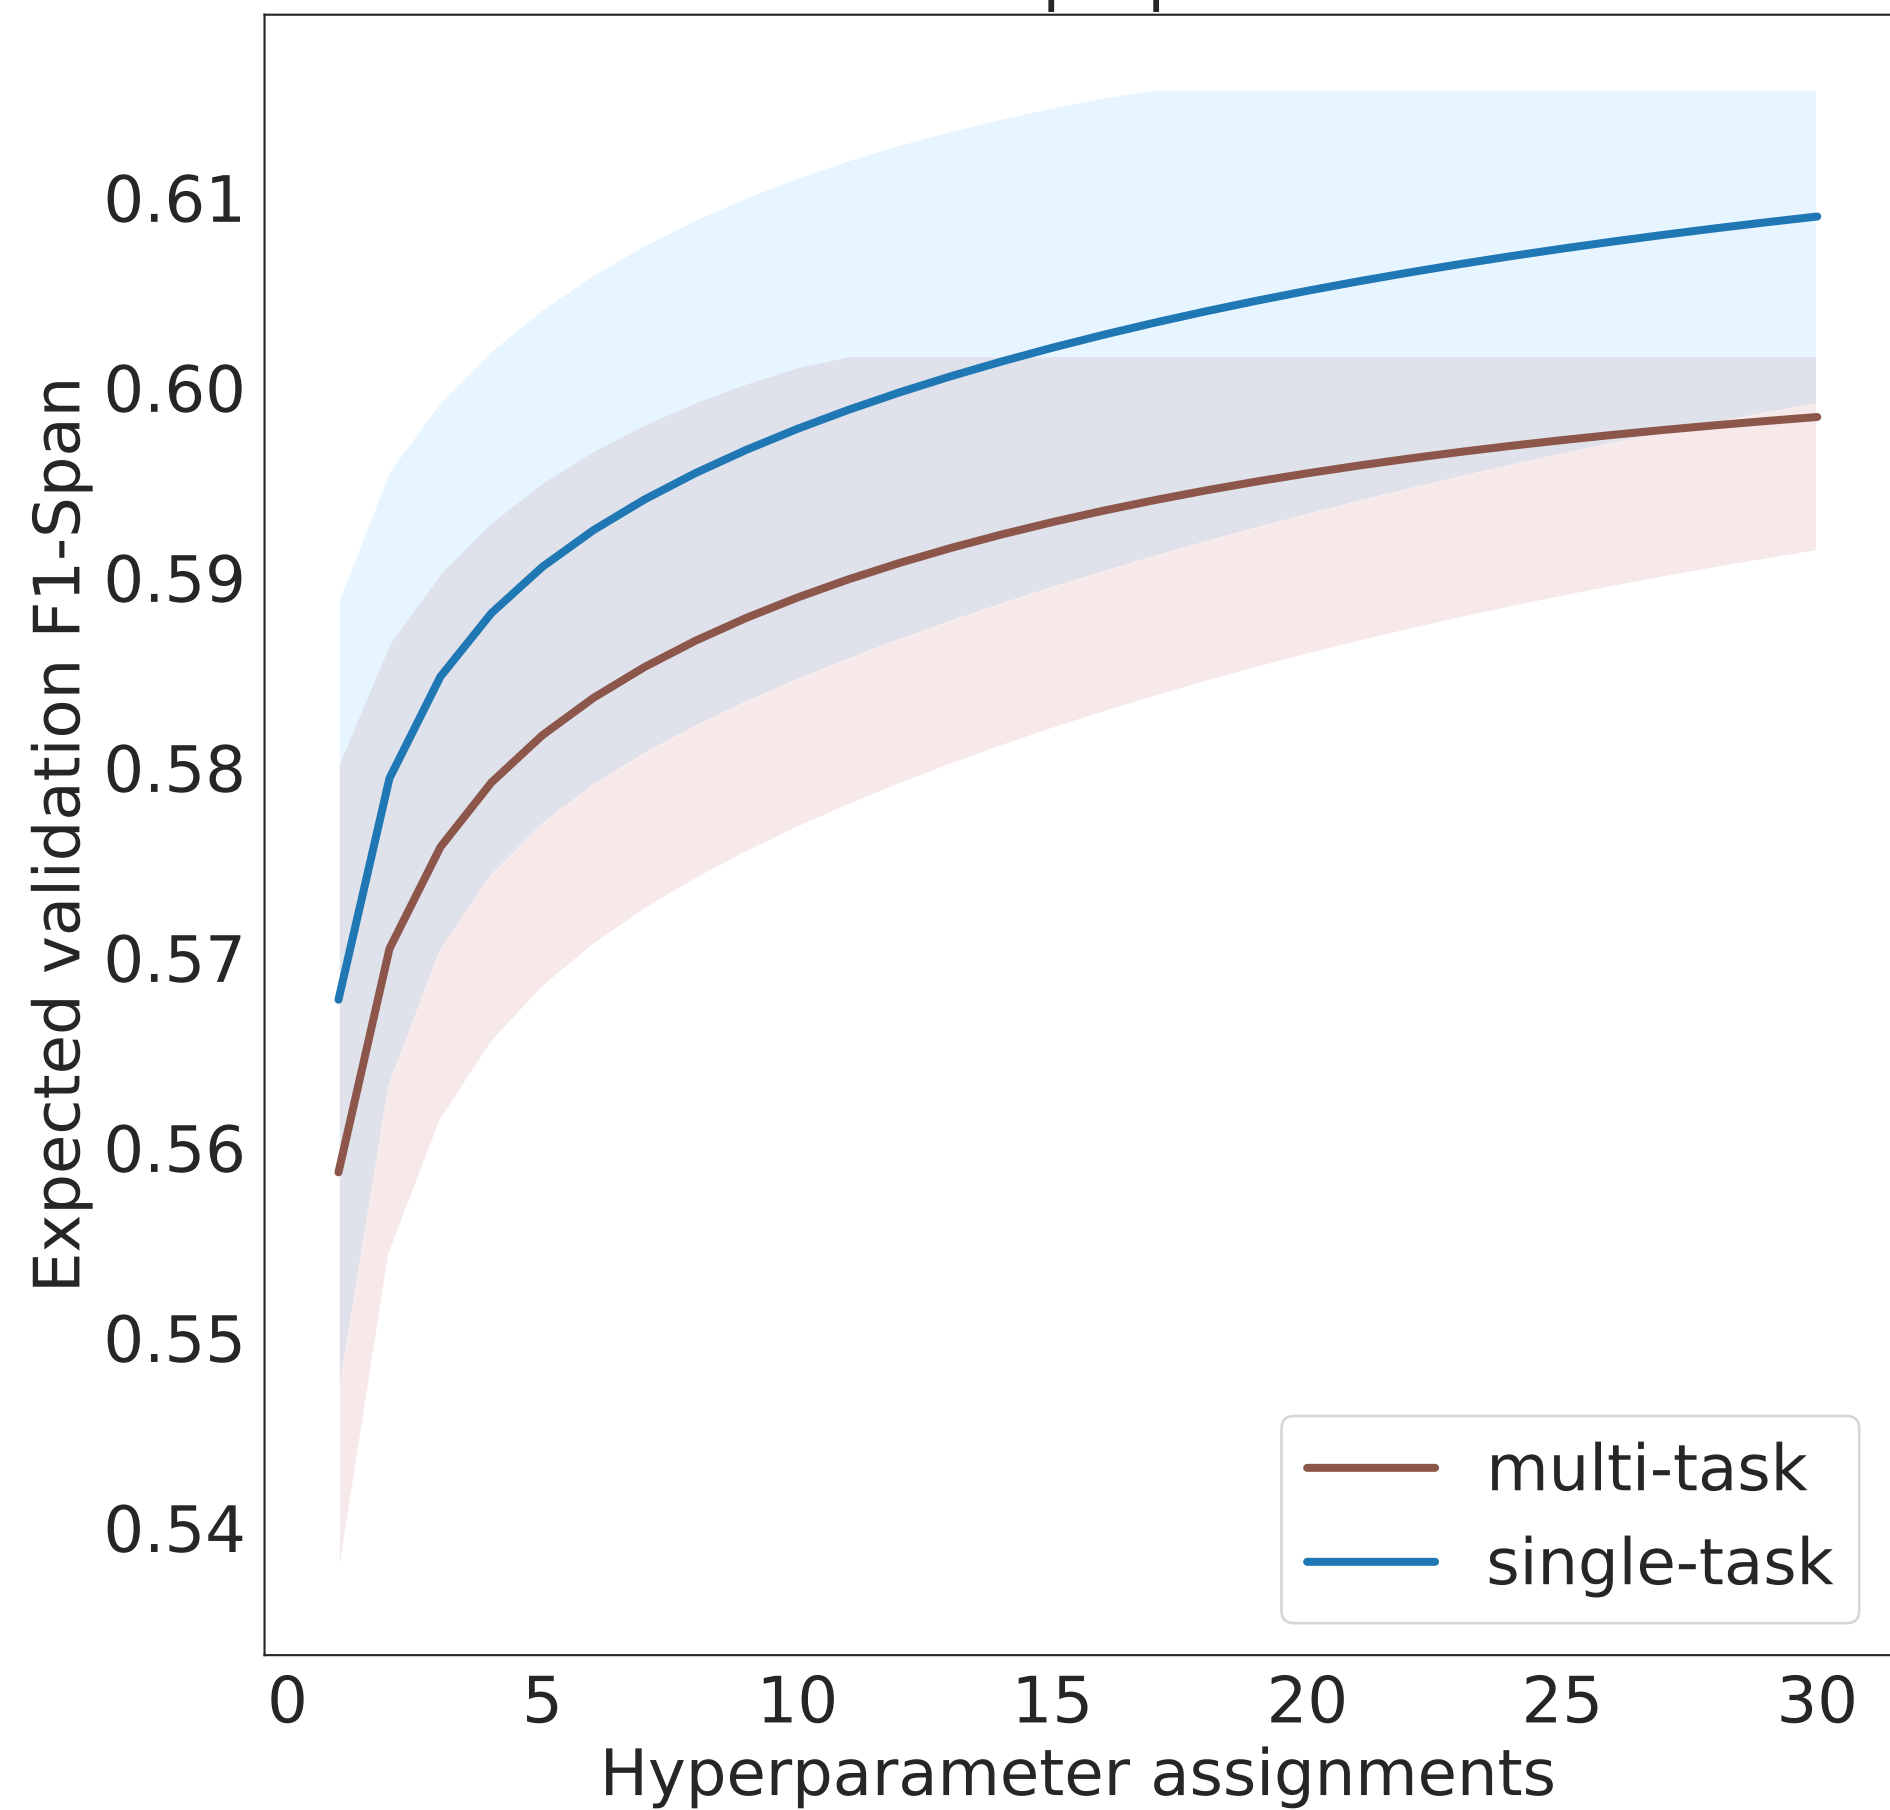

Supplement: OptionalSupplementaryCode [file 2021.naacl-main.227.OptionalSupplementaryCode.zip]
